# Supplementary material
Source: PubMed Central journal article supplement (PMC3671600)
Supplement: NIHMS467409-supplement-01.pdf [file NIHMS467409-supplement-01.pdf]

**Supplemental Figure S5:** Raw data from the impedance attachment assays before control normalization. Examples of MCF-10A and PTEN<sup>-/-</sup> cells in the absence and presence of 50 $\mu$ M Blebbistatin or 20 $\mu$ M ML-7. (Data normalized and presented in Fig. 3D)

**Table T1: PTEN loss and PIK3CA mutations in breast cancer cell lines**

|               | MCF10A* | ZR75-1 | Bt-20            | SkBr3 | MDA468 | Hs578t | BT549 | SUM149 | HCC1395 | MDA436 | HCC1937 |
|---------------|---------|--------|------------------|-------|--------|--------|-------|--------|---------|--------|---------|
| <b>PTEN</b>   | +       | -      | +                | -     | -      | ***    | -     | -      | -       | -      | -       |
| <b>PIK3CA</b> | WT      | WT     | P539R<br>H1047R§ | WT    | WT     | WT     | WT    | WT     | WT      | WT     | WT      |
| <b>P-AKT</b>  | Low     | High   | High             | High  | High   | High   | High  | High   | High    | High   | High    |

\*MCF10A cells are a diploid, non-tumorigenic human breast epithelial cells

\*\*Although PTEN is expressed, these cells have elevated P-Akt levels

§H1047R is a PI3K activating mutation

Unless otherwise cited genomic sequences for PIK3CA are catalogued in the Sanger Institute Cosmic database (catalogue of somatic mutations in cancer) <http://www.sanger.ac.uk/genetics/CGP/cosmic/>
